# Supplementary figures and images for: Autonomous and non-autonomous roles of DNase II during cell death in C. elegans embryos
Source: Oxford University Press journal article supplement (doi:10.1042/bsr20150055), 2015-04-27

Supplementary figure 1

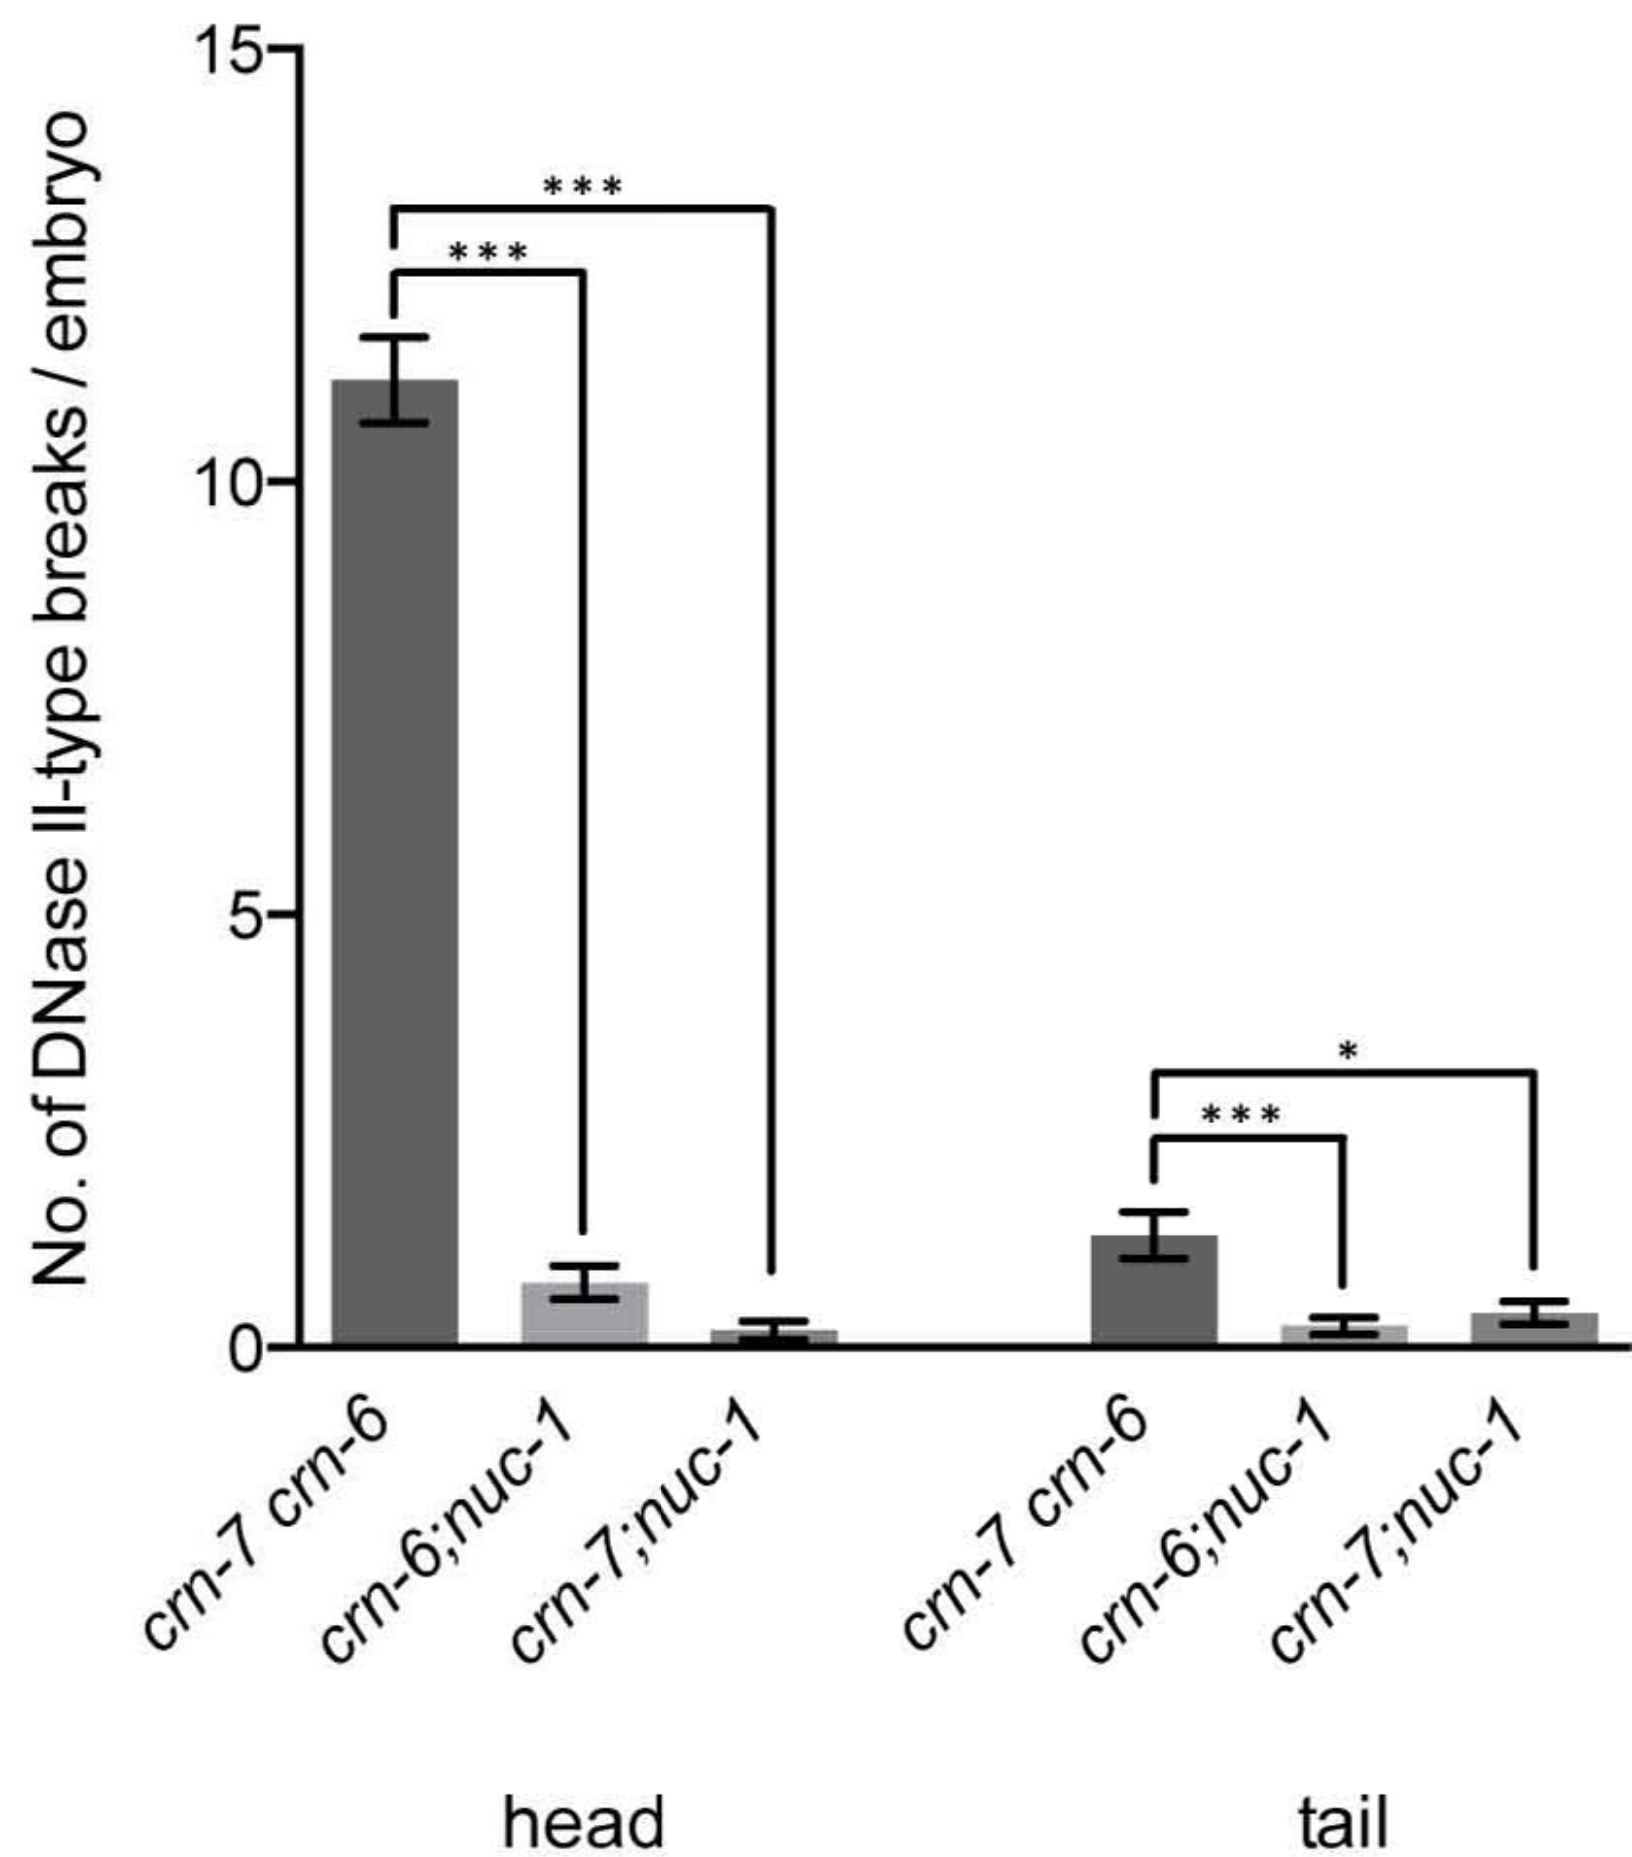

Supplement: bsr035e203add.pdf [file bsr035e203add.pdf]
